# Supplementary material for: Pyrotinib plus capecitabine for trastuzumab-resistant, HER2-positive advanced breast cancer (PICTURE): a single-arm, multicenter phase 2 trial
Source: Springer Nature journal article supplement (doi:10.1186/s12916-023-02999-0), 2023-08-09
Supplement: MOESM1 [file 25904390]

**Table S1.** Tumor response

|                                       | <b>Total<br/>(n=100)</b> | <b>Subgroup A<br/>(n=21)</b> | <b>Subgroup B<br/>(n=49)</b> | <b>Subgroup C<br/>(n=30)</b> |
|---------------------------------------|--------------------------|------------------------------|------------------------------|------------------------------|
| <b>Confirmed response, n (%)</b>      |                          |                              |                              |                              |
| Complete response                     | 7 (7.0)                  | 0                            | 7 (14.3)                     | 0                            |
| Partial response                      | 63 (63.0)                | 11 (52.4)                    | 36 (73.5)                    | 16 (53.3)                    |
| Stable disease                        | 17 (17.0)                | 3 (14.3)                     | 5 (10.2)                     | 9 (30.0)                     |
| Progressive disease                   | 8 (8.0)                  | 3 (14.3)                     | 1 (2.0)                      | 4 (13.3)                     |
| Not evaluable                         | 1 (3.3)                  | 1 (3.3)                      | 0                            | 0                            |
| Not assessed*                         | 4 (13.3)                 | 3 (14.3)                     | 0                            | 1 (3.3)                      |
| <b>Objective response rate, n (%)</b> | <b>70 (70.0)</b>         | <b>11 (52.4)</b>             | <b>43 (87.8)</b>             | <b>16 (53.3)</b>             |
| 95% confidence interval               | 60.0-78.8                | 29.8-74.3                    | 75.2-95.4                    | 34.3-71.7                    |
| Nominal <i>P</i> vs. subgroup A       |                          |                              | 0.001                        | 0.947                        |
| Nominal <i>P</i> vs. subgroup C       |                          |                              | <0.001                       |                              |

Subgroup A included patients who had progression during adjuvant trastuzumab; subgroup B included patients who had progression within 12 months of completing adjuvant trastuzumab; subgroup C included patients who had progression within 6 months after the initiation of first-line trastuzumab for advanced disease.

\*Four patients discontinued treatment before the first post-baseline imaging examination.

**Table S2.** Indirect comparison across studies

| <b>Study</b>    | <b>Definition of primary trastuzumab resistance</b>                                                                                                                                                                                                            | <b>Treatment</b>                      | <b>ORR</b>          | <b>mPFS (months)</b> |
|-----------------|----------------------------------------------------------------------------------------------------------------------------------------------------------------------------------------------------------------------------------------------------------------|---------------------------------------|---------------------|----------------------|
| Morrow et al.   | Have PD after $\geq 1$ trastuzumab-based therapy for MBC                                                                                                                                                                                                       | Everolimus + trastuzumab              | NA                  | 4.1 (n=47)           |
| Hurvitz et al.  | Progressed during or within 3 months of receiving the last dose of trastuzumab for advanced disease or recurred within 12 months of completing trastuzumab-based (neo)adjuvant therapy                                                                         | Everolimus + trastuzumab + paclitaxel | 22% (12/55)         | 5.5                  |
| BOLERO-3        | Recurrence during or within 12 months of adjuvant treatment or progression during or within 4 weeks of treatment for advanced disease                                                                                                                          | Everolimus + trastuzumab              | 41% (116/284)       | 7.0                  |
|                 |                                                                                                                                                                                                                                                                | + vinorelbine                         | vs.                 | vs.                  |
|                 |                                                                                                                                                                                                                                                                | vs.<br>Trastuzumab + vinorelbine      | 37% (106/285)       | 5.8                  |
| LUX-Breast 1    | Progressed on or within 12 months of completing adjuvant trastuzumab (treatment must have been for $\geq 9$ weeks); progressed on or within 6 months of completing first-line trastuzumab for metastatic disease (treatment must have been for $\geq 6$ weeks) | Afatinib + vinorelbine                | 46% (154/334)       | 5.5                  |
|                 |                                                                                                                                                                                                                                                                | vs.<br>Trastuzumab + vinorelbine      | vs.<br>47% (79/168) | vs.<br>5.6           |
| PIKHER2         | Trastuzumab-resistant                                                                                                                                                                                                                                          | Buparlisib + lapatinib                | 4% (1/24)           | NA                   |
| Pistilli et al. | Recurrence while on or within 4 weeks since the most                                                                                                                                                                                                           | Buparlisib + trastuzumab              | 10% (5/50)          | NA                   |

---

|                         |                                                                                                                                                                                                                    |                             |                                                         |                                            |
|-------------------------|--------------------------------------------------------------------------------------------------------------------------------------------------------------------------------------------------------------------|-----------------------------|---------------------------------------------------------|--------------------------------------------|
|                         | recent infusion for patients who received trastuzumab for metastatic disease (or within 12 months for patients who received trastuzumab as adjuvant therapy)                                                       |                             |                                                         |                                            |
| Jain et al.             | Locally advanced disease must be inoperable and have progressed within 6 months of trastuzumab and/or taxane treatment and metastatic disease must have progressed during or after trastuzumab and taxane therapy. | Alpelisib + T-DM1           | 43% (6/14)                                              | 8.1                                        |
| PANACEA                 | Documented progression during previous trastuzumab-based therapy                                                                                                                                                   | Pembrolizumab + trastuzumab | PD-L1-positive: 15% (6/40)<br>PD-L1-negative: 0% (0/12) | PD-L1-positive: 2.7<br>PD-L1-negative: 2.5 |
| Present study (PICTURE) | Progression during (neo)adjuvant trastuzumab or within 12 months of completing (neo)adjuvant trastuzumab (treatment must have been for $\geq 9$ weeks), or progression within 6 months after initiation of first-  | Pyrotinib + capecitabine    | 70.0% (70/100)                                          | 11.8                                       |

---

---

line trastuzumab for advanced disease (treatment must  
have been for  $\geq 6$  weeks)

---

ORR, objective response rate; mPFS, median progression-free survival; NA, not applicable; T-DM1, trastuzumab emtansine; PD-L1, programmed cell death-ligand 1.

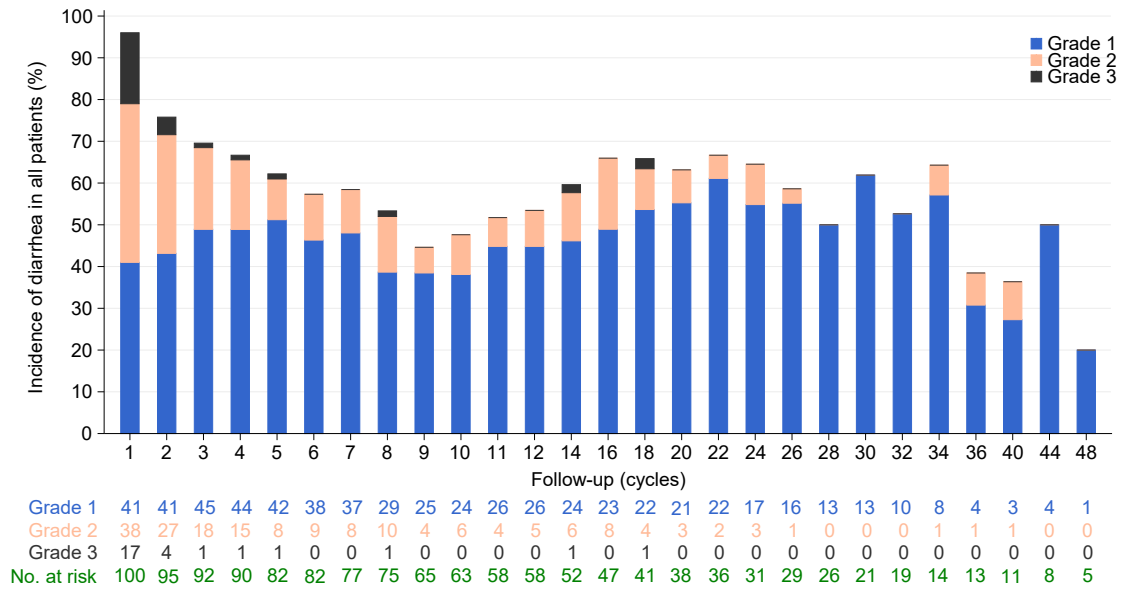

**Fig. S1** The incidence of diarrhea in each treatment cycle.
